# Supplementary material
Source: PubMed Central journal article supplement (PMC3518629)

**A**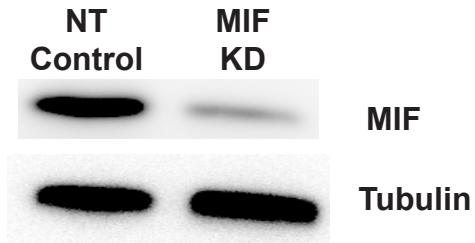**B**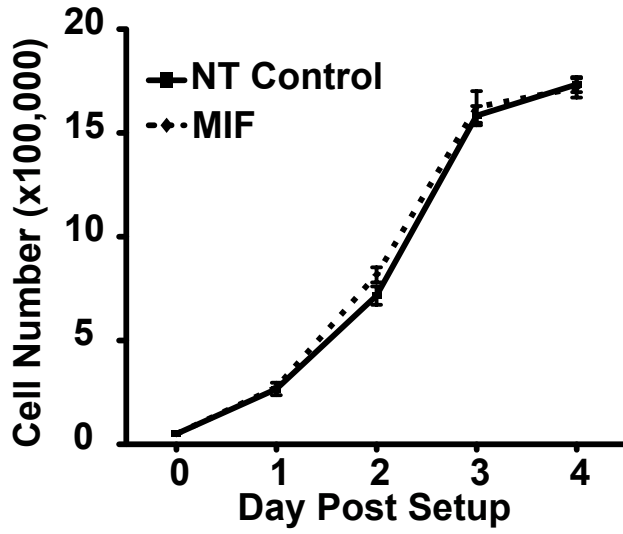**C**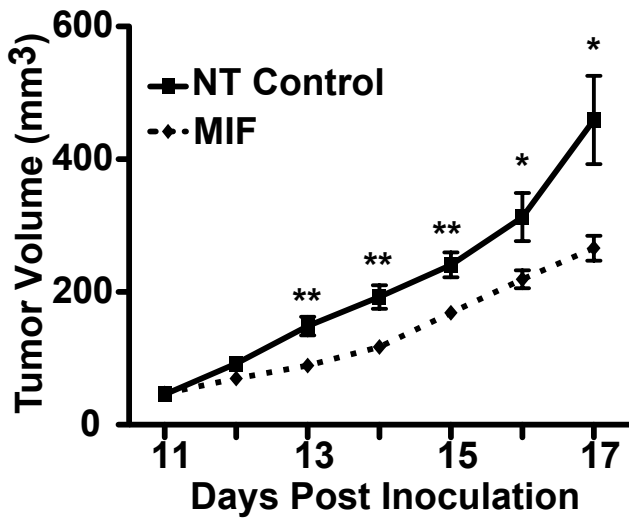**D**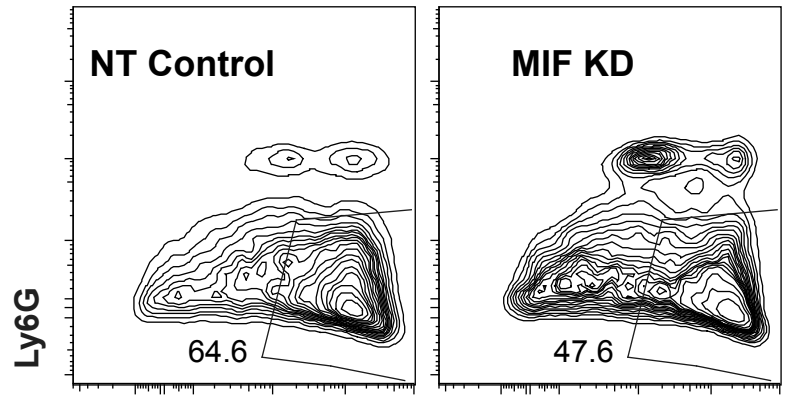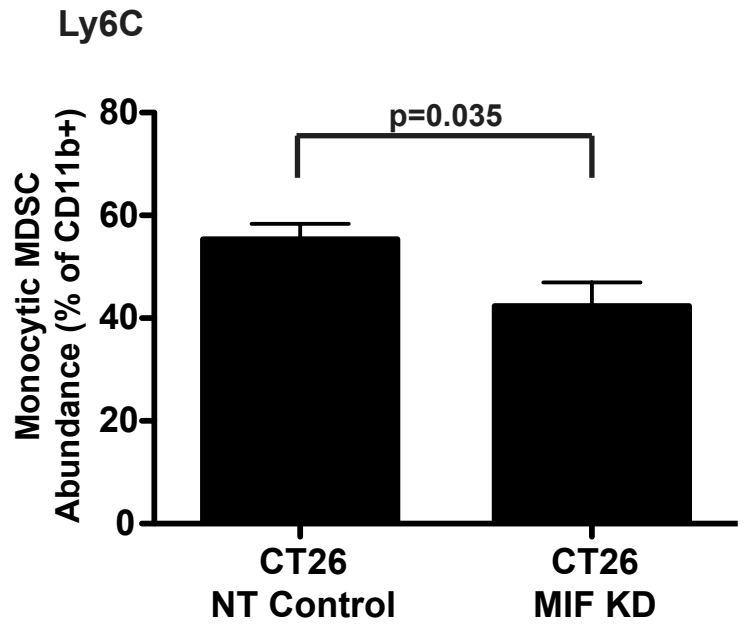

Supplemental Figure 1

Supplement: NIHMS414813-supplement-1.pdf [file NIHMS414813-supplement-1.pdf]

**A**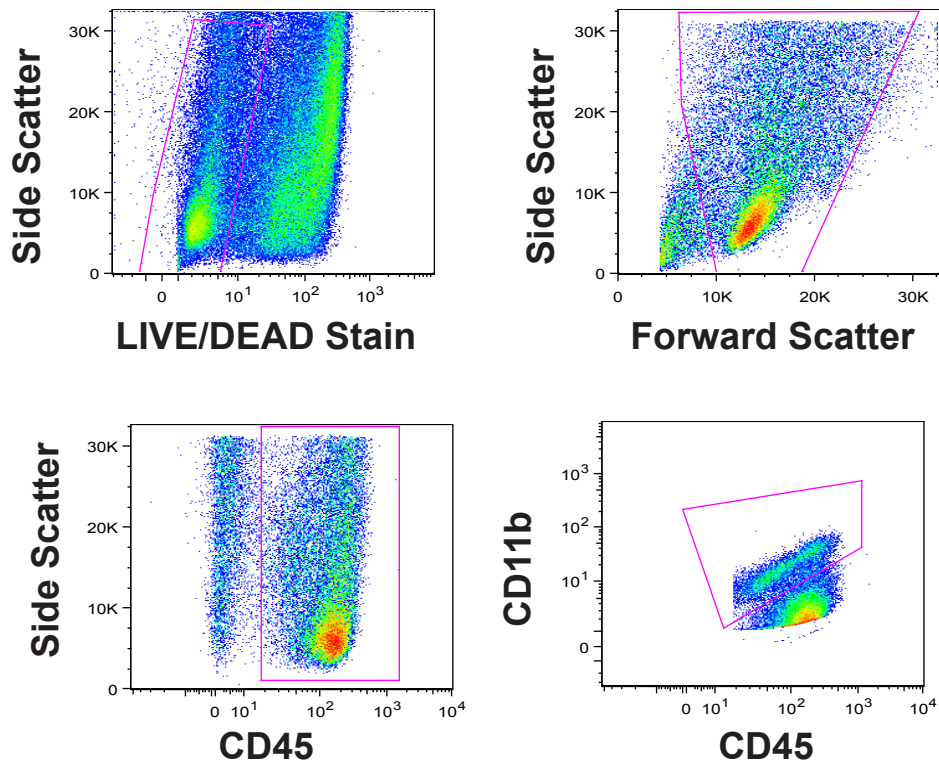**B**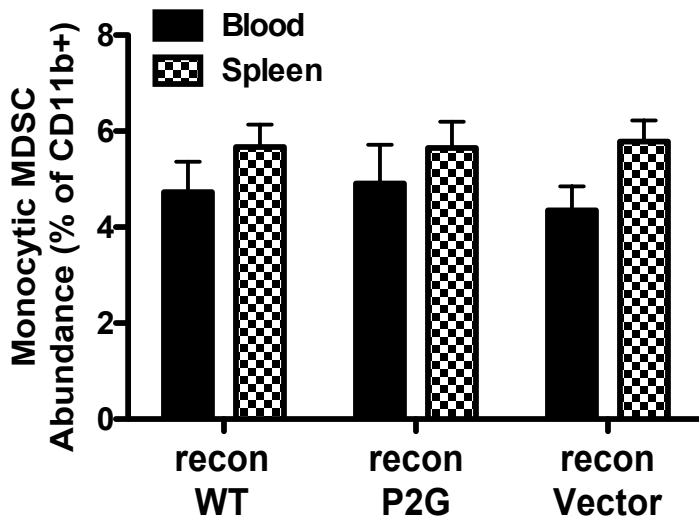**C**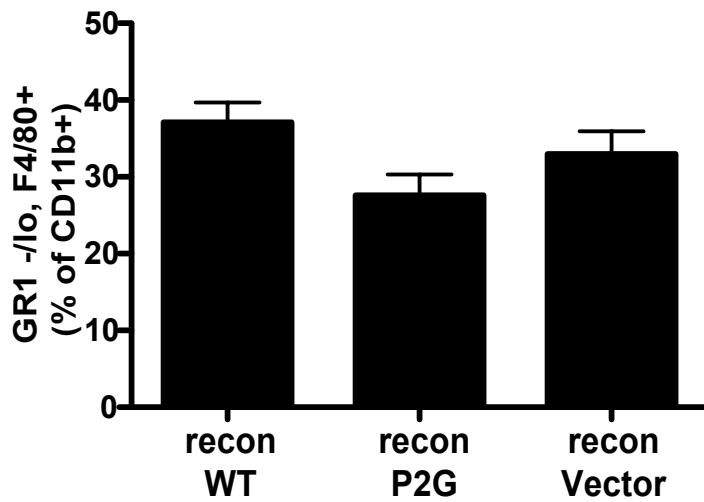

Supplement: NIHMS414813-supplement-2.pdf [file NIHMS414813-supplement-2.pdf]

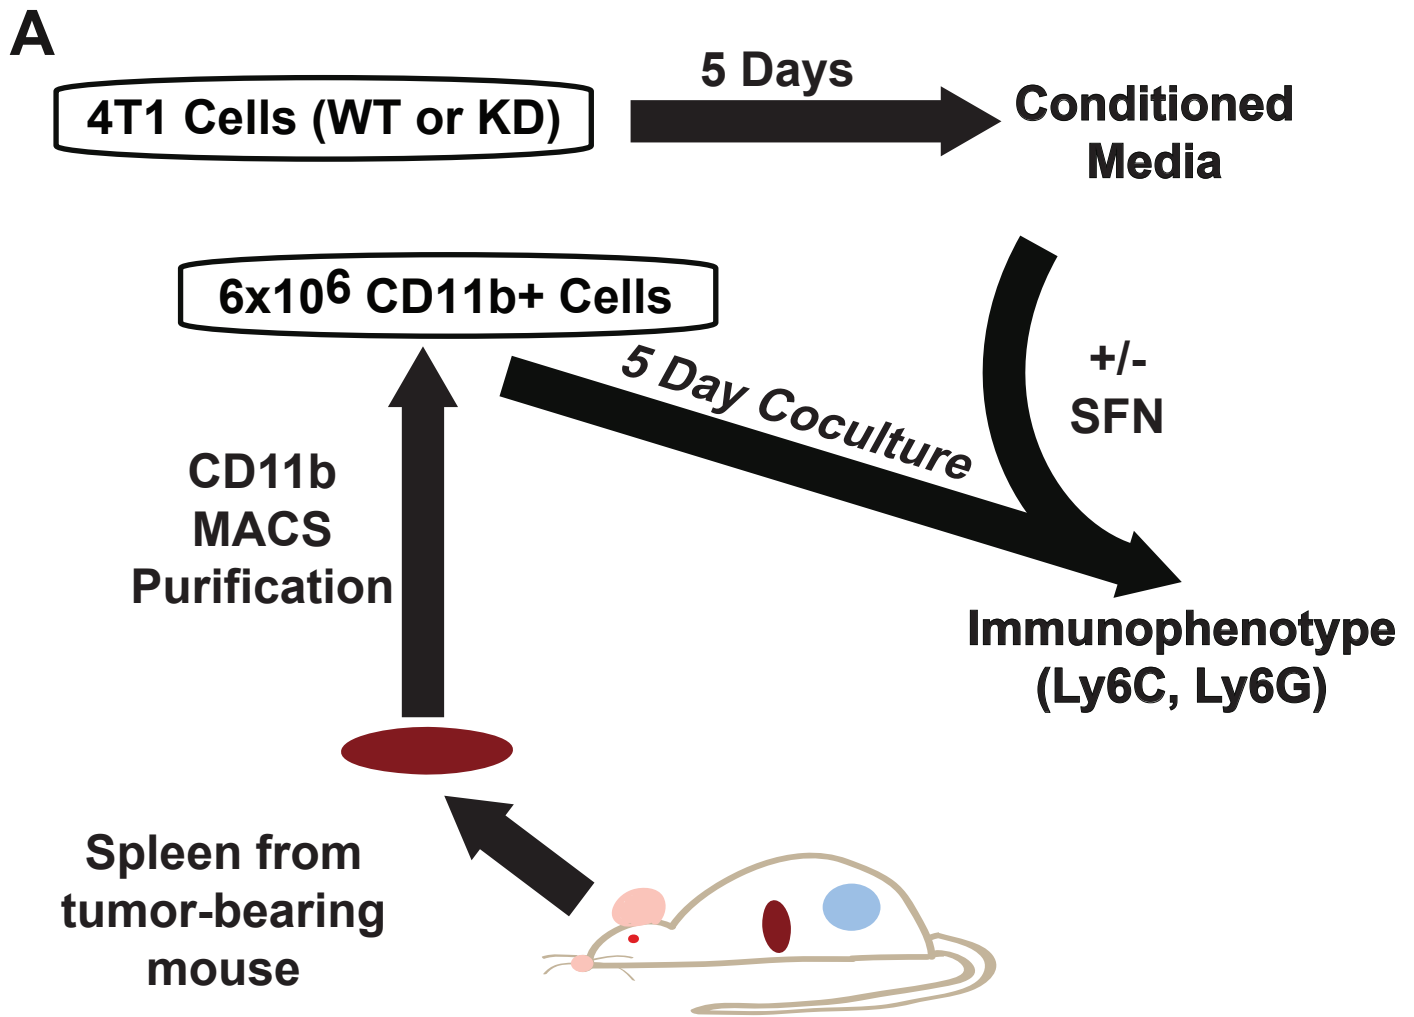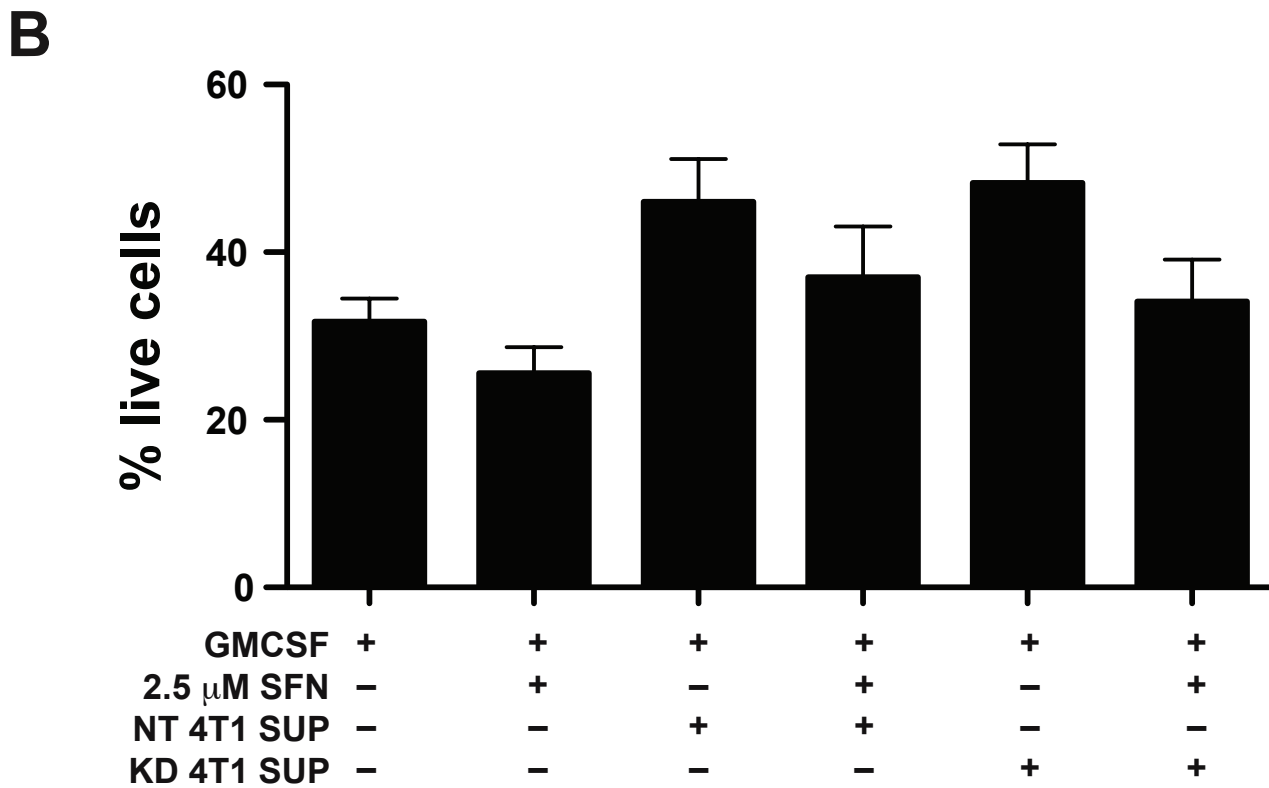

Supplement: NIHMS414813-supplement-3.pdf [file NIHMS414813-supplement-3.pdf]

**A**

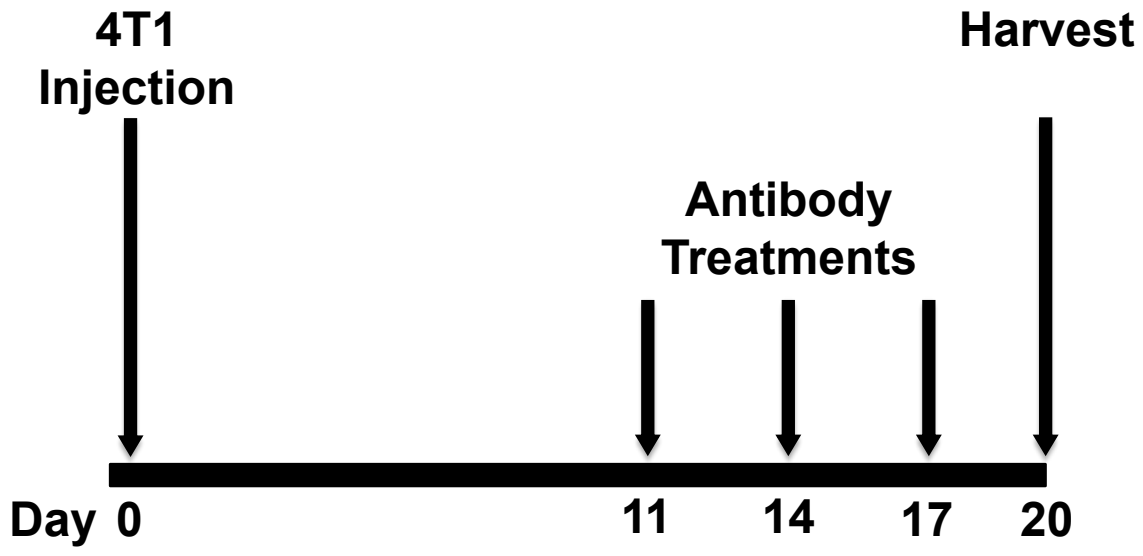

**B**

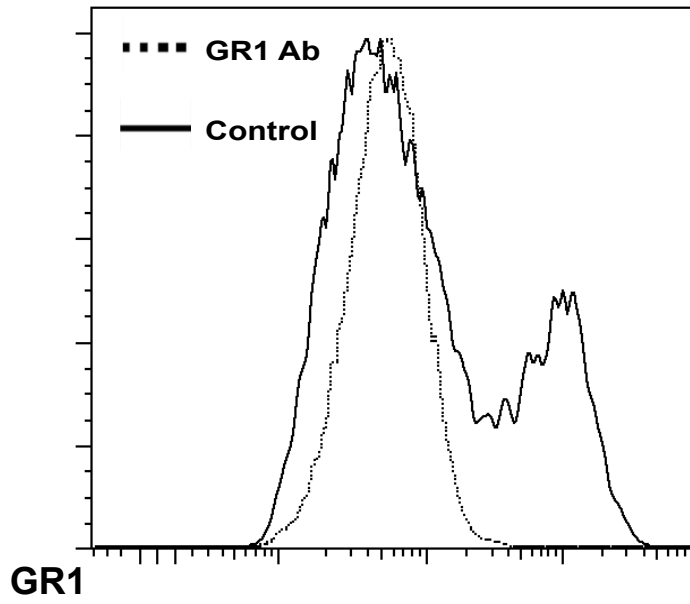

Supplement: NIHMS414813-supplement-4.pdf [file NIHMS414813-supplement-4.pdf]
